# Supplementary material
Source: PubMed Central journal article supplement (PMC6898730)
Supplement: NIHMS1027772-supplement-Supp_FigS1.pdf [file NIHMS1027772-supplement-Supp_FigS1.pdf]

S1

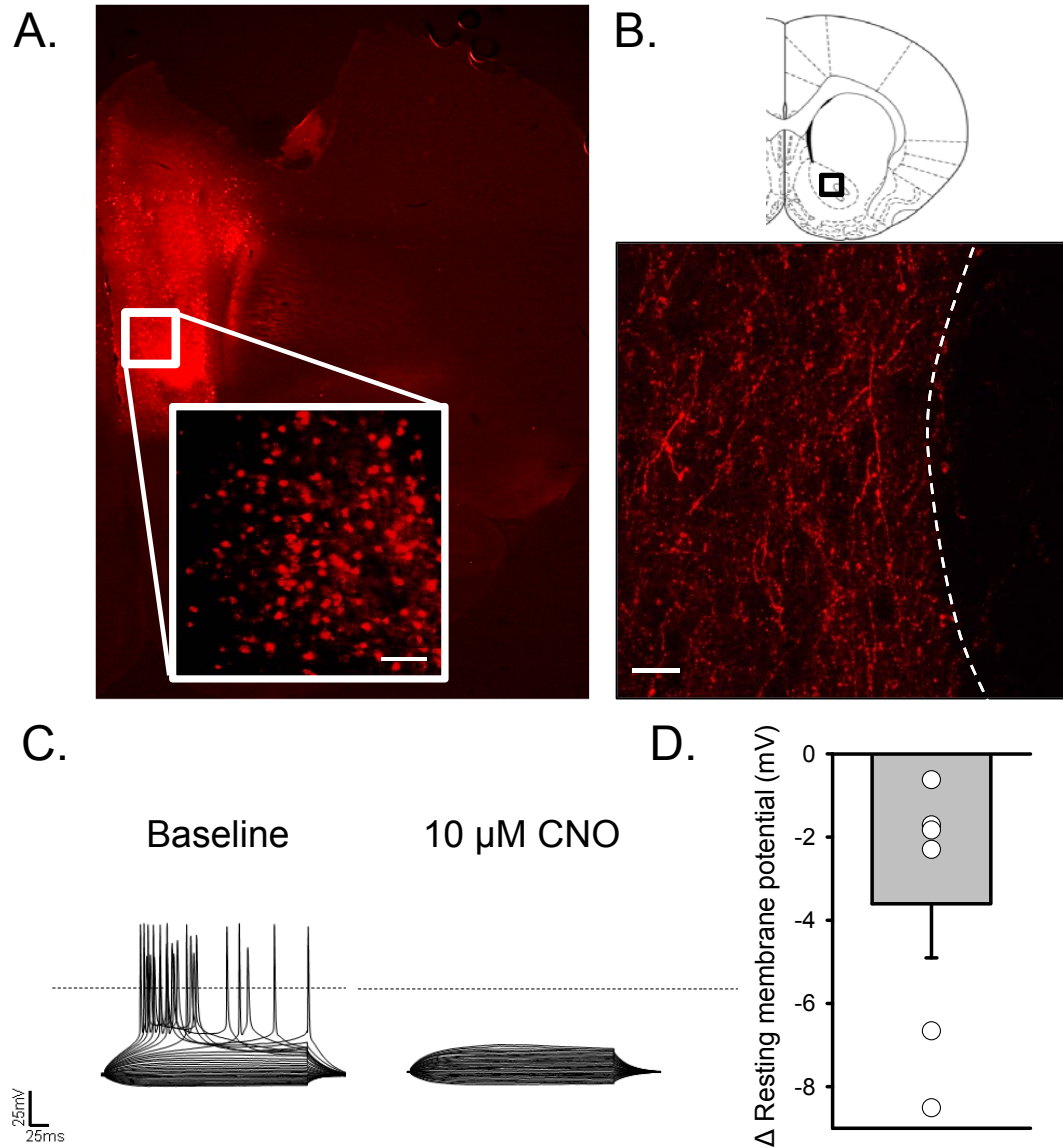

Validation of DREADD expression and function in the mPFC.  
(A) Representative hM4D-mCherry expression in mPFC at 2x and 20x respectively. Scale bar is 1000  $\mu\text{m}$ .  
(B) Representative hM4D-mCherry expression in AcbC at 40x. Scale bar is 50  $\mu\text{m}$ . Representative trace recordings are shown in panel C. Following 10 $\mu\text{m}$  CNO, cell firing was inhibited which was coupled with a significant decrease in resting membrane potential (D).
