# Supplementary material
Source: PubMed Central journal article supplement (PMC6898730)
Supplement: NIHMS1027772-supplement-Supp_FigS2.pdf [file NIHMS1027772-supplement-Supp_FigS2.pdf]

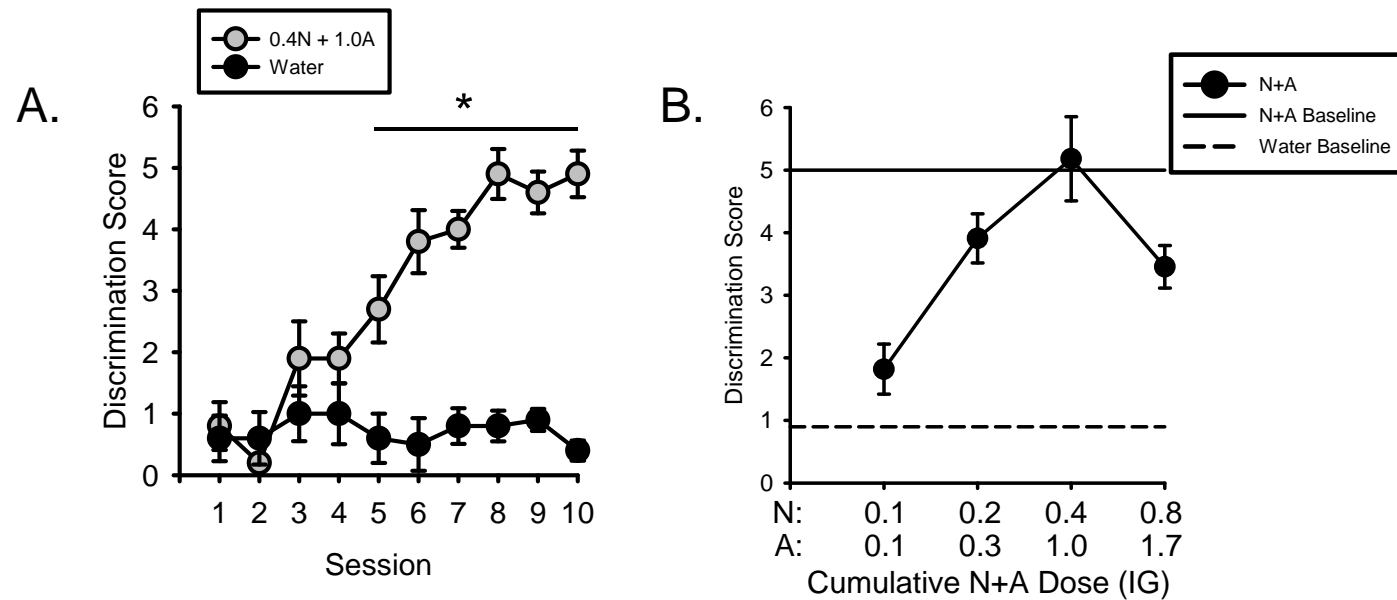

Rats learned to discriminate between N+A and water within 5 pairings of each (A). Discrimination score at the training dose (0.4N+1.0A) in the generalization curve did not differ from pre-test baseline confirming stimulus control (B). Solid and dashed lines indicate mean N+A and water baselines, respectively, prior to testing.
